# Supplementary material for: ﻿New species of Sticta (lichenised Ascomycota, lobarioid Peltigeraceae) from Bolivia suggest a high level of endemism in the Central Andes
Source: PubMed Central journal article supplement (PMC9849061; doi:10.3897/mycokeys.92.89960), 2022-09-13

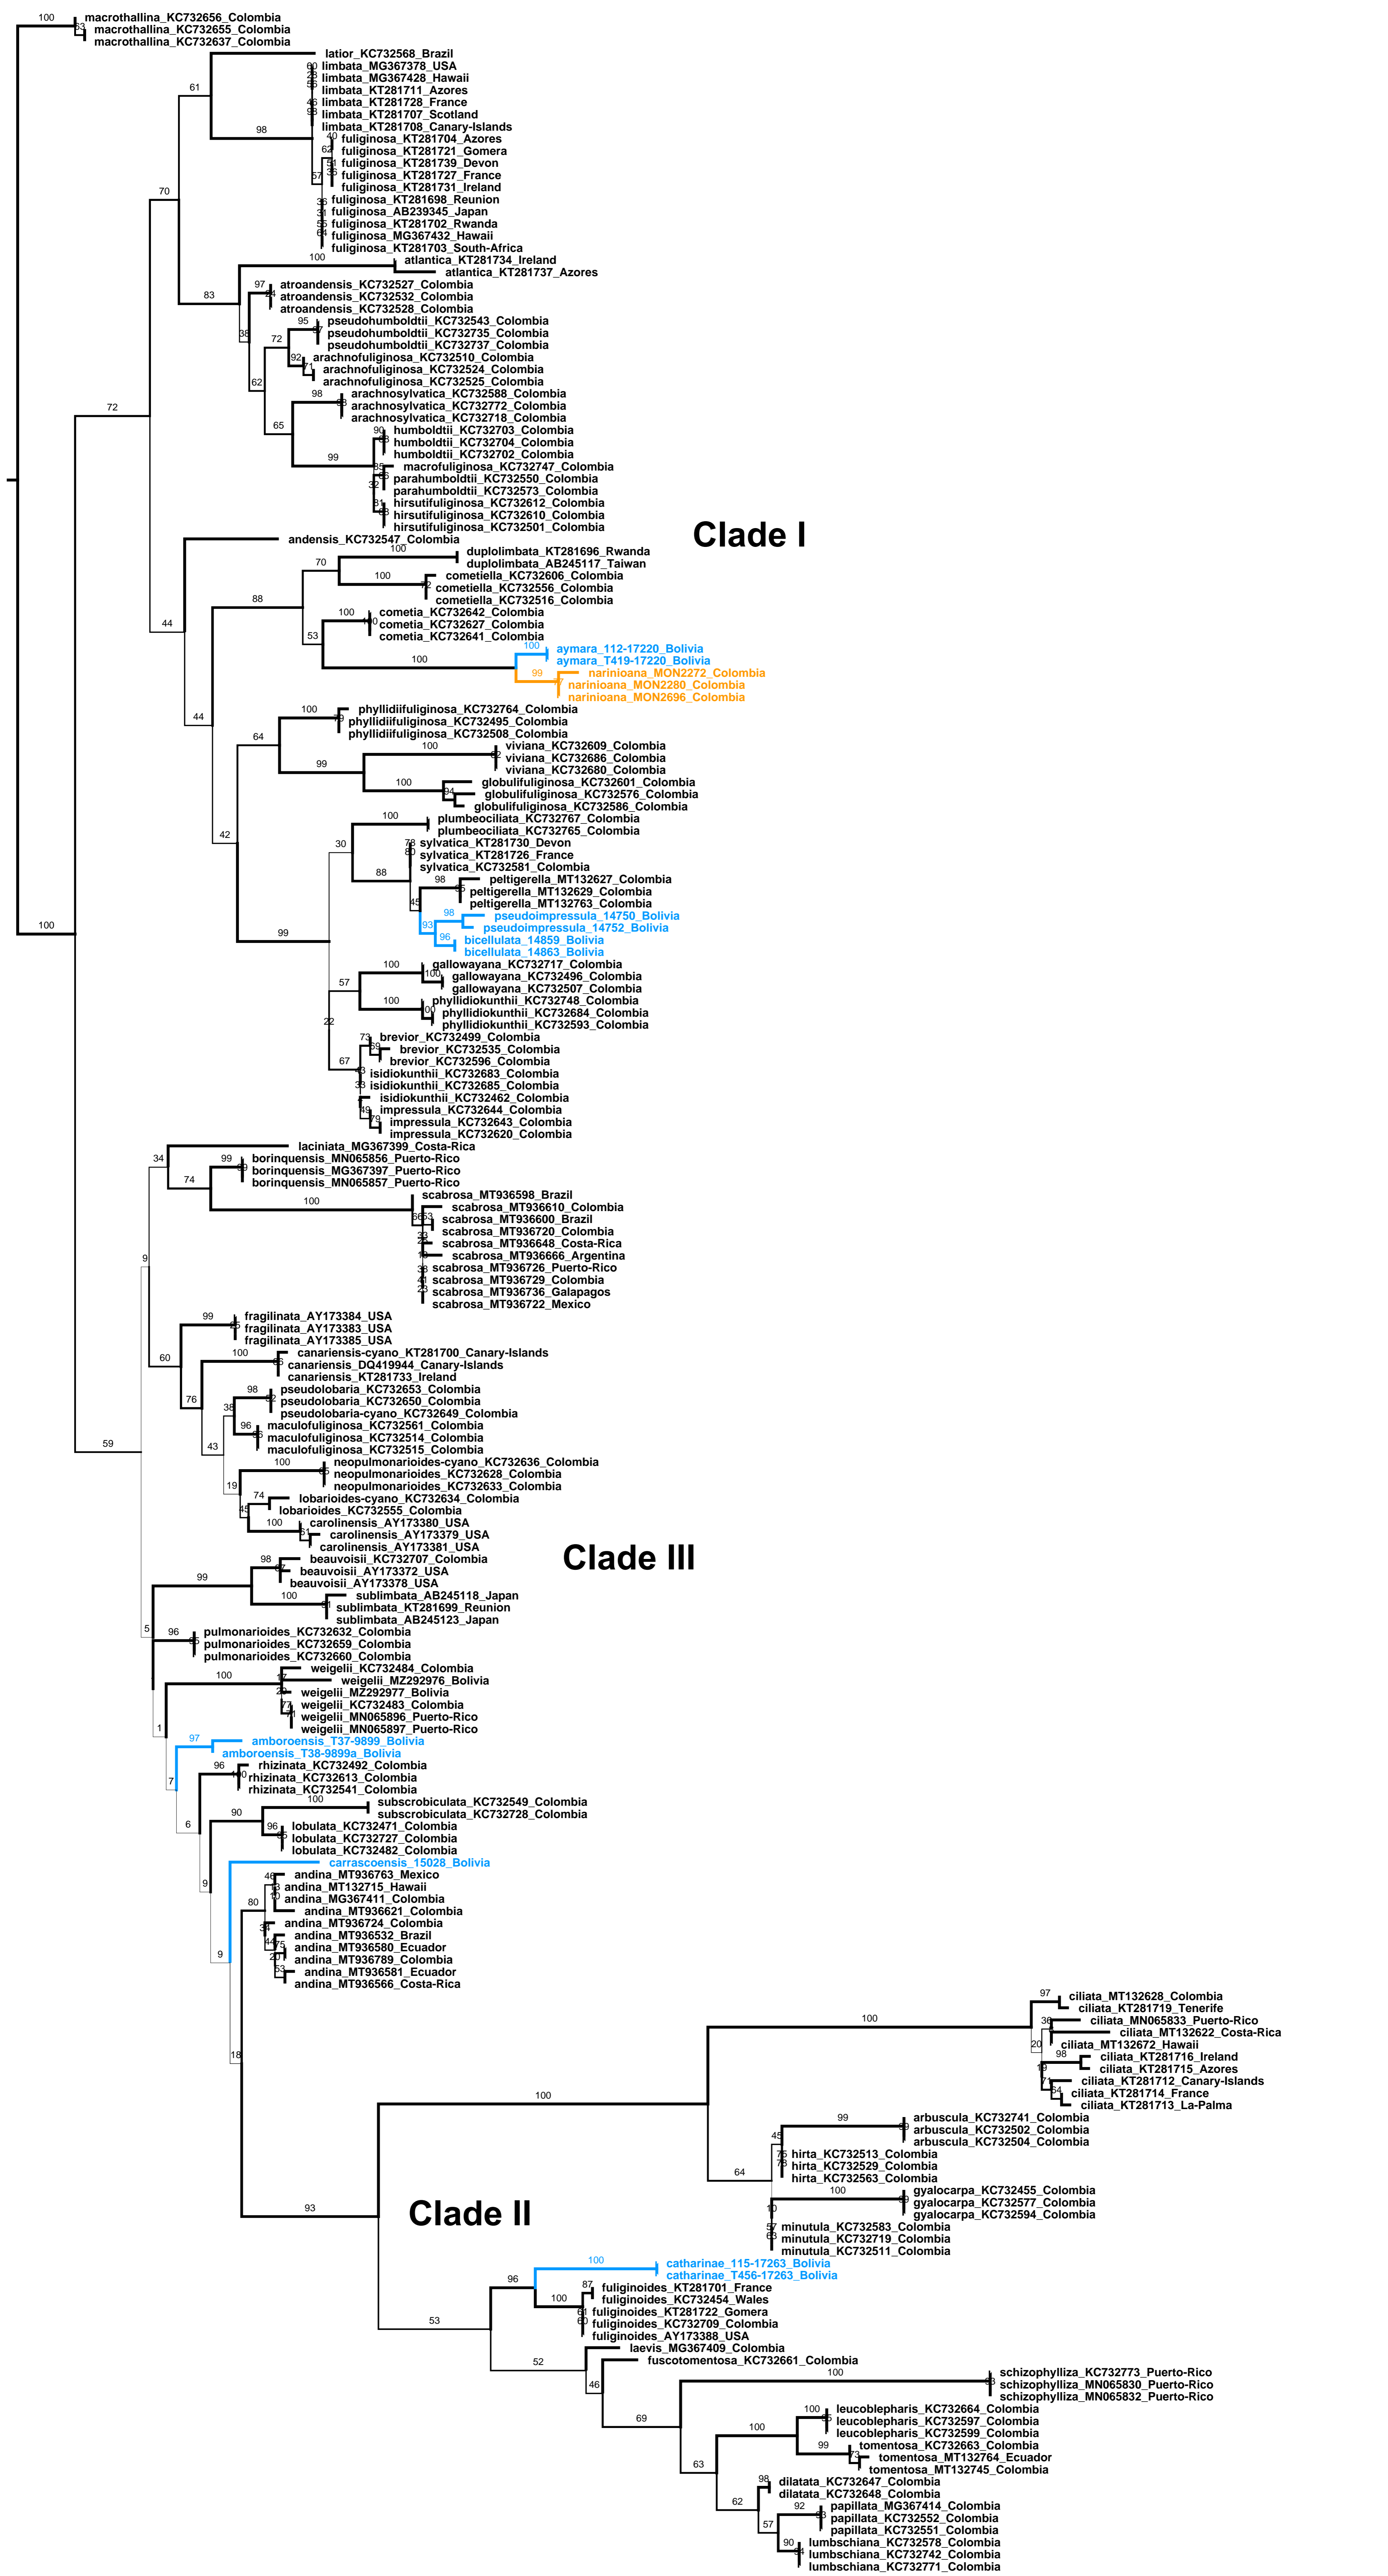

Supplement: mycokeys-92-131-s003.pdf [file mycokeys-92-131-s003.pdf]
